1 **The Role of Children in SARS-CoV-2 Variant of Concerns Transmission within**  
2 **Households: A Meta-analysis**

3 Yanshan Zhu<sup>1#</sup>, Yao Xia<sup>2,3#</sup>, Janessa Pickering<sup>4</sup>, Asha C. Bowen<sup>4,5</sup> & Kirsty R. Short<sup>1,6\*</sup>

- 4
- 5 1. School of Chemistry and Molecular Biosciences, The University of Queensland, Brisbane,
  - 6 Australia.
  - 7 2. School of Science, Edith Cowan University, Joondalup, Western Australia, Australia
  - 8 3. School of Biomedical Sciences, University of Western Australia, Perth, Western Australia,
  - 9 Australia
  - 10 4. Wesfarmer's Centre for Vaccines and Infectious Diseases, Telethon Kids Institute,
  - 11 University of Western Australia, Nedlands, Perth, Western Australia
  - 12 5. Department of Infectious Diseases, Perth Children's Hospital, Nedlands, Perth, Western
  - 13 Australia
  - 14 6. Australian Infectious Diseases Research Centre, The University of Queensland, Brisbane,
  - 15 Australia

16 # Authors contributed equally to this manuscript.

17 \* Email: [k.short@uq.edu.au](mailto:k.short@uq.edu.au)

18  
19  
20  
21 **40 word summary:** The role of children in the household transmission of VOCs, relative to the  
22 ancestral virus, remains unclear. Using a meta-analysis we show that the emergence of VOCs were  
23 associated with a fundamental shift in the epidemiology of SARS-CoV-2

24  
25  
26  
27  
28  
29  
30  
31  
32  
33

34 **Abstract**

35 Background: Meta-analysis and single site studies have established that children are less infectious  
36 within a household when positive for ancestral SARS-CoV-2. In addition, children appear less  
37 susceptible to infection when exposed to ancestral SARS-CoV-2 within a household. The emergence of  
38 SARS-CoV-2 variants of concern (VOC) has been associated with an increased number of pediatric  
39 infections worldwide. However, the role of children in the household transmission of VOCs, relative to  
40 the ancestral virus, remains unclear. Methods: Here, we perform a meta-analysis of the role of children  
41 in the household transmission of both ancestral SARS-CoV-2 and SARS-CoV-2 VOCs. Results: Unlike  
42 the ancestral virus, children infected with VOCs spread SARS-CoV-2 to an equivalent number of  
43 household contacts as infected adults. Similarly, unlike the ancestral virus, children within a household  
44 were equally as likely as adults to acquire SARS-CoV-2 from an infected family member. Interestingly,  
45 this same observation was noted when unvaccinated children exposed to VOCs were compared to  
46 unvaccinated adults exposed to VOCs. Conclusions: Together, these data suggest that the emergence of  
47 VOCs were associated with a fundamental shift in the epidemiology of SARS-CoV-2. This is unlikely  
48 to solely be the result of age-dependent differences in vaccination during the VOCs period and instead  
49 may reflect virus evolution over the course of the pandemic.

50 **Keywords:** COVID-19; SARS-CoV-2; variants of concern; children; household transmission.

51

52

53

54

55

56

57

58

59

60

61

62

63

64

65

66

## 67 Introduction

68 In the first six months of the Severe acute respiratory syndrome coronavirus 2 (SARS-CoV-2)  
69 pandemic there were numerous household transmission studies suggesting that compared to adults,  
70 children were less susceptible to SARS-CoV-2 infection and less likely to transmit the virus [1]. These  
71 findings were echoed in studies outside of households where the infection rate of SARS-CoV-2  
72 amongst children less than 10 years old was significantly lower than that of adults [2]. However, since  
73 August 2020, the continuous emergence of new variants of SARS-CoV-2 has raised questions about a  
74 fundamental shift in the epidemiology of SARS-CoV-2[3].

75 Globally, there has been at least three peaks corresponding to the prevalence of variants of concern  
76 (VOCs) Alpha (or Beta/Gamma), Delta and Omicron [3, 4]. During these waves there has been  
77 speculation that children have become more susceptible to SARS-CoV-2 infection and more infectious  
78 once they contract the virus. For example, during the Delta wave in Singapore children (aged 0-11  
79 years) were significantly more likely to transmit and acquire SARS-CoV-2 in a household compared to  
80 young adults (18-29 years) [5]. Similarly, during the Omicron wave in the USA the secondary attack  
81 rates (SAR) were consistently high across household contact and index age groups, including those  
82 aged 0-4 years old [6].

83 Despite these data from single site studies, meta-analysis on the role of children in the spread of VOCs  
84 (relative to the ancestral virus) are generally lacking, with studies often focused on the ancestral virus  
85 [7] or not differentiating between data collected during the pre- and post-VOCs period [8]. Where pre-  
86 VOCs and post-VOCs based studies have been differentiated, data suggests an increased role for  
87 children in the household transmission of VOCs [7]. However, such analysis remains confounded by  
88 the fact that globally, adults have been prioritized for vaccination [9]. Vaccination campaigns for  
89 COVID-19 were largely rolled out from December 2020 onwards but with a primary focus on  
90 vaccinating individuals over the age of 18 years. Vaccination of children 5-11 years of age was not  
91 approved by the U.S. Food and Drug Administration (FDA) until October 2021[10]. Pediatric  
92 vaccination rates remain consistently lower than those of adults [11], with FDA approval for  
93 vaccination in children 6 months to under five years of age only approved in June 2022. Vaccination  
94 significantly reduces the household transmission of SARS-CoV-2 [12]. As a result, it is difficult to  
95 ascertain if any observed epidemiological changes in the demographics of viral transmission over time  
96 are the result of a fundamental change in the virus over time or if a potential increase in pediatric  
97 infections and transmission is simply indicative of the lower vaccination rate amongst children.

98 To assess what effect the SARS-CoV-2 variants of concern (VOCs) have on children in terms of  
99 infectiousness and susceptibility to SARS-CoV-2 infection within a household, here we perform a  
100 meta-analysis comparing pediatric SARS-CoV-2 transmission during the pre and post VOCs period.

101

102

103

104 **Methods**

105 **Case definitions**

106 We adapted the WHO household transmission investigation protocol for coronavirus disease 2019  
107 (COVID-19) [13]. A household transmission was defined as a group of people (2 or more) living in the  
108 same residence in whom two or more positive SARS-CoV-2 cases subsequently occurred during the  
109 follow-up visits within 28 days of the index. An index case was defined as the first case of laboratory-  
110 confirmed COVID-19 in the same household. A secondary case was defined as a known household  
111 contact of the confirmed infected index who has been tested positive for SARS-CoV-2 during the  
112 follow up period. A household contact was defined as a person who has cohabited with the index case  
113 in a defined period of time. In this context, the secondary attack rate is a measure of the frequency of  
114 secondary infections of COVID-19 among household contacts in a defined period of time, as  
115 determined by a positive COVID-19 result. Adults were defined as individuals  $\geq 18$  years old whilst  
116 children were defined as individuals below 18 years old.

117 **Classification of SARS-CoV-2 Variants of Concern by study period**

118 Studies were classified as pertaining to the ancestral virus or a VOC based on available genotype data  
119 and/or the timing of the study period. Specifically, studies where SARS-CoV-2 genotype was not  
120 documented, and the index case identification period was prior to January 1, 2021, were defined as the  
121 period of ancestral virus predominance. Studies where data was collected between January 1, 2021 and  
122 June 30, 2022 were categorised as VOCs period.

123 **Vaccination status**

124 In investigating the effect of vaccination on transmission, only studies reporting vaccination status of  
125 household contacts were included. Vaccinated individuals were defined as those who had received at  
126 least one dose of a SARS-CoV-2 vaccine.

127 **Search strategy and eligibility criteria**

128 Literature searching was performed in accordance with Preferred Reporting Items for Systematic  
129 Reviews and Meta-Analyses (PRISMA) statement[14]. Our original systematic review screened  
130 literatures through August 24, 2020[1], therefore in this study, publications available between August  
131 25, 2020, and June 30, 2022, were accessed from PubMed, Covid MEDLINE, Embase, and Web of  
132 Science, using the search term: (“COVID-19” OR “SARS-CoV-2” OR “variant”) AND (“household  
133 transmission” OR “family cluster” OR “household contact”) OR (“transmissibility” OR “attack rate”)  
134 OR (“vaccination” OR “attack rate”) with no language or location restrictions. Given the role of  
135 preprints in timely dissemination of research findings during the COVID-19 pandemic, we also  
136 conducted searches of the medRxiv and bioRxiv servers using the search term (“COVID-19” OR  
137 “SARS-CoV-2”) AND (“household transmission” OR “secondary attack rate”) for the posted articles.  
138 Investigator YZ developed the initial search strategy, which was then validated by YX and JP.  
139 Additional relevant articles from the reference sections were also reviewed. Studies that were duplicate  
140 publications, modeling studies, case reports and/or reviews were excluded (Fig. 1).

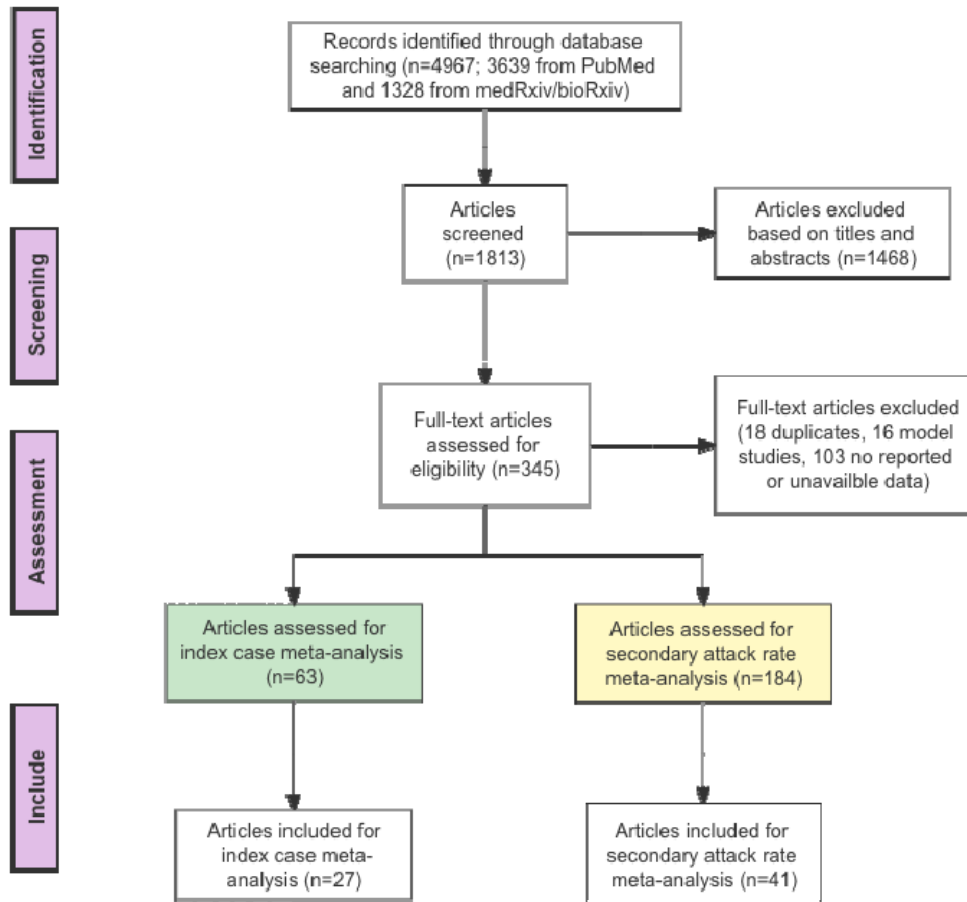

141

142 **Fig. 1** Preferred Reporting Items for Systematic Reviews and Meta-analysis (PRISMA) flow diagram.

143 **Statistical analysis**

144 We assessed the infectiousness and susceptibility of children and adults to SARS CoV-2 infection  
 145 during different time periods by pooling all data deemed eligible by the above selection criteria.  
 146 Susceptibility to SARS CoV-2 VOCs infection was estimated by pooling the secondary attack rates  
 147 (SARs) for household contacts. We estimated the Relative Risk (RR) for SARS CoV-2 household  
 148 secondary infection stratified by the age of index cases, the age of household contacts, and the  
 149 vaccination status of household contacts for each study. We then used Generalized Linear Mixed  
 150 Models[15] to estimate pooled RRs along with corresponding 95% confidence intervals. As only  
 151 observational studies were used, we used a random effects model, equalizing the weight of the studies  
 152 to the pooled estimate. Where relevant, we stratified the analysis by pre-specified characteristics  
 153 including the characteristics of index cases and contacts. Heterogeneity between studies was evaluated  
 154 using the  $I^2$  statistic test. A threshold of  $I^2 > 50\%$  was used as indicating statistically significant  
 155 heterogeneity. All summary analyses and meta-analysis were performed using R studio software  
 156 (version 3.6.1).

157

158 **Results**

159 A total of 4967 studies (3936 publications and 1328 preprint articles) were initially identified from the  
160 literature search. Among these studies 1468 were excluded based on title and abstract. After further  
161 evaluation, 345 studies were eligible for full text review and 48 studies met the inclusion criteria, of  
162 which 27 contained eligible data included for the index case meta-analysis and 41 new studies  
163 combining with 11 studies from our previous review [1] for secondary attack rate meta-analysis (Table  
164 S1). Specially, twenty studies involving 12 countries (USA, South Africa, Netherlands, UK, Norway,  
165 Israel, Germany, Denmark, Singapore, Japan, India and Thailand) assessed the secondary attack rate  
166 during the period of VOCs dominance. Twenty-seven studies from 16 countries (Brazil, China, India,  
167 Greece, Japan, USA, UK, Spain, Bosnia and Herzegovina, Malaysia, Netherlands, Israel, Australia,  
168 Norway, Singapore and Canada) were subjected to analysis for secondary attack rate in the period  
169 defined as pre-VOCs (Table S1).

170 **Children were less infectious within households during the period that the ancestral virus was**  
171 **dominant**

172 Fourteen studies were identified that defined the age of the index case and the SAR in the household  
173 during the time period in which the ancestral virus was dominant (until 1 January 2021). Another 14  
174 studies were identified that defined the age of the index case and the SAR in the household during the  
175 time period in which VOCs were dominant. An increasing trend of estimated SAR overtime is shown  
176 in Fig. 2. During the time period when the ancestral virus was dominant (before 1<sup>st</sup> January 2021), a  
177 pediatric index case was associated with a significantly lower secondary attack rate compared to an  
178 adult index case (RR= 0.61; 95% CI, 0.47-0.80, Fig. S1). In contrast, there was no significant  
179 difference with SAR (RR = 0.98; 95% CI: 0.85-1.13) between a pediatric index case and an adult index  
180 case during the VOCs period (Fig. S1). The role of younger children (<12 years old) in transmitting a  
181 VOC within the household was then examined by 8 observational studies with no significant  
182 heterogeneity ( $I^2= 19\%$ ,  $P=0.29$ ), which involve pediatric index cases of different ages. The secondary  
183 attack rates caused by a younger pediatric index post-VOCs were higher than rates attributable to an  
184 older child index case, in which we found an estimated 46% significant increase in SAR among  
185 household contacts (Fig. S2). Together, these data suggest that children, especially younger children,  
186 were more infectious in the family during the period of VOCs dominance.

187

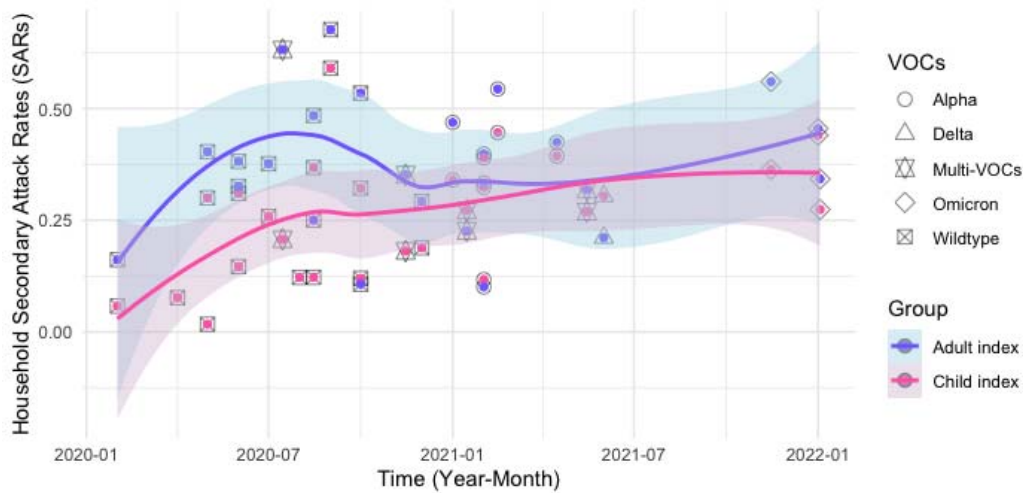

188

189 **Fig. 2** Time pattern for the secondary attack rate from a child index and an infected adult index in  
 190 household SARS-CoV-2 transmission and smoothed curve of SARs by month during the study period.  
 191 Each time point is based on the midpoint of study period in each study. Multi-VOCs points represent  
 192 studies with 2 or more predominant variants.

193

194 **Children have a higher secondary attack rate in household transmission of SARS-CoV-2 during**  
 195 **the period of VOCs dominance**

196 To determine the susceptibility of children to household SARS-CoV-2 infections, the secondary attack  
 197 rate in the household contacts was assessed in 27 pre-VOC studies and 20 VOC studies. The increasing  
 198 trends of secondary attack rate among children and adults contacts in household SARS-CoV-2  
 199 transmission was associated with the growing dominance of SARS-CoV-2 VOCs since 2021 (Fig. 3).  
 200 The random effects model results suggest that children were statistically less likely to acquire ancestral  
 201 SARS-CoV-2 (SAR=18%, 95% CI: 0.12-0.26) than VOCs (SAR=31%, 95% CI: 0.24-0.38, Fig. S3),  
 202 and subgroup difference test showed  $P < 0.01$ . In contrast, before VOCs were dominant, the average  
 203 pooled SAR of adult (SAR=29%, 95% CI: 0.23-0.39) was similar with those during the VOC period  
 204 (SAR=31%, 95% CI: 0.26-0.37) ( $P=0.64$ , Fig. S4). As shown in Fig. 3B, household SARs were higher  
 205 for VOCs among children contacts compared to the ancestral virus and equivalent to those among their  
 206 adult family members.

207

208

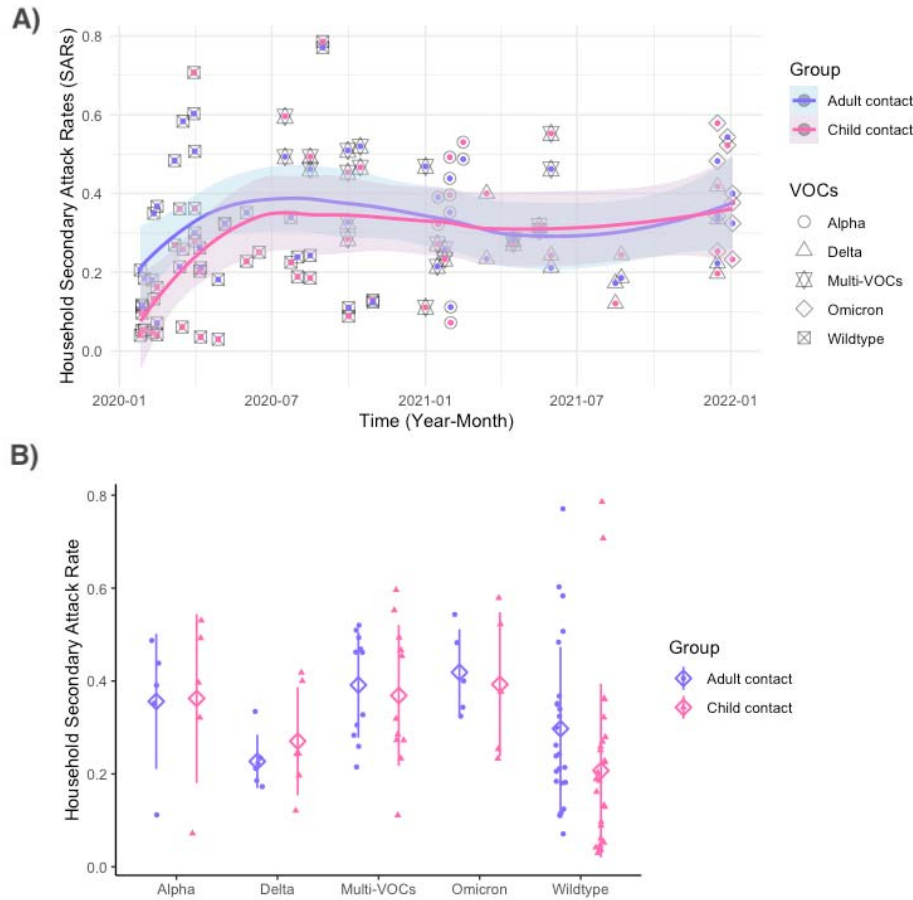

209

210 **Fig. 3** A) Time pattern for the secondary attack rate among children and adults contacts in household  
 211 SARS-CoV-2 transmission and smoothed curve of secondary attack rates by month during the study  
 212 period. Each time point is based on the midpoint of study period in each study. Multi-VOCs points  
 213 represent studies with 2 or more predominant variants. B) The secondary attack rate in household  
 214 SARS-CoV-2 transmission among children and adults contact stratified by different VOCs.

215

216 Although we observed significant heterogeneity between the included studies, in a subset analysis  
 217 where additional information was provided on the age of the pediatric contact, younger children  
 218 (<12 years) were no more or less susceptible to infection compared with older children ( $\geq 12$  years)  
 219 during pre-VOCs period; RR = 0.77 (95% CI, 0.59-1.02, Fig. 4). This is consistent with our prior  
 220 analysis of the SAR in children and adults during the first year of COVID-19 pandemic [1]. However,  
 221 the period of VOCs shows a different scenario, in which there was an estimated 46% statistically  
 222 significant increase in SAR among younger children household contacts. RR = 1.46 (95% CI, 1.10-1.94,  
 223 Fig. 4). In addition, our findings show that compared to older children, estimated risks of younger  
 224 children acquiring SARS-CoV-2 was significantly different in the two periods ( $P < 0.01$ ), although the  
 225 heterogeneity among the observational studies during the post VOCs was high ( $I^2 = 97\%$ ,  $P < 0.01$ ).



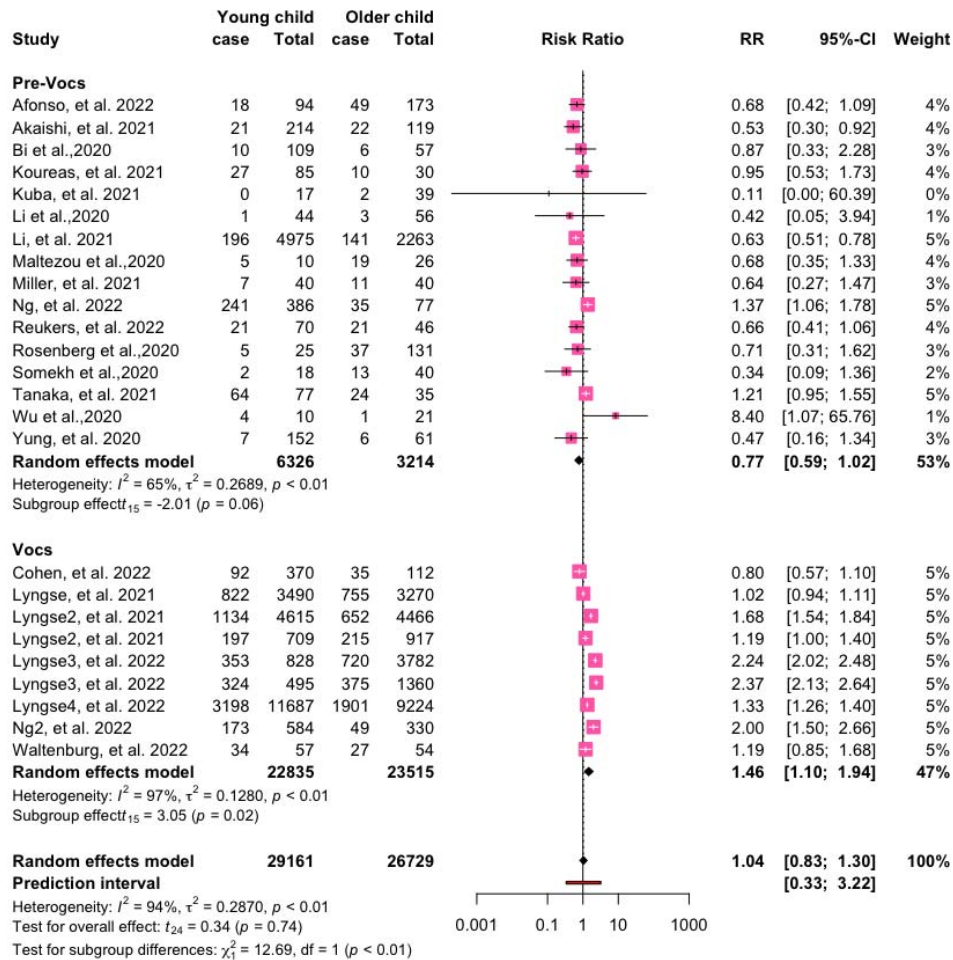

226

227 **Fig. 4.** Relative risk (RR) for the secondary attack rate of younger and older children in  
 228 household severe acute respiratory syndrome coronavirus 2 (SARS-CoV-2) transmission stratified by  
 229 the pre and post VOCs period. Cases describe the number of SARS-CoV-2 positive individuals  
 230 identified in the study. Abbreviation: CI, confidence interval.

231

232 The above studies were classified as the pre- or post- VOCs period based on the time at which the data  
 233 was collected. To confirm the same results were obtained when specific virus genotyping was  
 234 performed, the same analysis was performed with a subset of studies where the specific VOC was  
 235 determined. Consistent with our prior results[1], children were significantly less likely to acquire the  
 236 ancestral virus in the household compared with adults (Fig. S5). In contrast, the risk of children being  
 237 infected with Alpha, Delta or Omicron was not significantly different from exposed adult household  
 238 contacts (Fig. S5).

239 The above data suggest that children were more infectious (Fig. 2, Fig. S1) and more susceptible to  
 240 infection (Fig. 3, Fig. S3) during the period at which VOCs were dominant. However, this was also the  
 241 period at which vaccination amongst adults became widespread. To determine if age-dependent

242 differences in vaccination affected these data we examined SARs by vaccination status (during the  
 243 VOC period only) of household contacts regardless of vaccination status or age of the index cases.  
 244 Only nine studies from Netherlands, USA, Norway, Israel, Denmark, Singapore, Japan, and UK,  
 245 reported the effectiveness of vaccination against secondary transmission of SARS-CoV-2 within the  
 246 household. Consistent with previous studies [16], the estimated SAR was higher for unvaccinated adult  
 247 contacts than fully or partially vaccinated adults, RR = 1.78 (95% CI, 1.49-2.13) with heterogeneity ( $I^2$   
 248 = 78%,  $P < 0.01$ , Fig. 5). These data demonstrate that vaccination can affect SARs within the  
 249 household. To address this issue in the context of age-dependent differences in vaccination and  
 250 transmission, we analysed a subset of studies that investigated the SAR in unvaccinated children and  
 251 unvaccinated adults collected during the period of VOC dominance. In the absence of vaccination there  
 252 was no difference in the SAR between adults and children (RR = 0.91 (95% CI, 0.78-1.07; Fig. 5). This  
 253 is consistent with our prior analysis of the SAR in children and adults (Fig. S5).

254

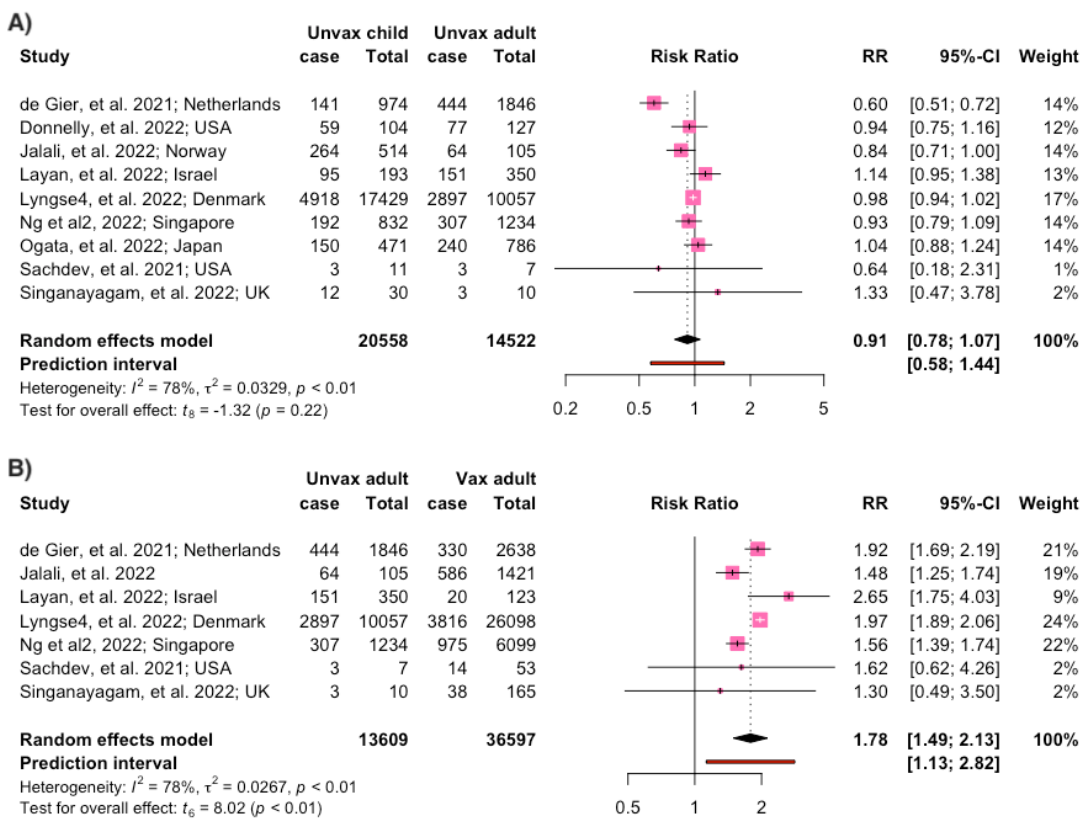

255

256 **Fig. 5** Relative risk (RR) for the SARs of child contact and adult contact in household SARS-CoV-2  
 257 VOCs transmission Stratified by vaccination status. Cases describe the number of SARS-CoV-2  
 258 positive individuals identified in the study. Abbreviation: CI, confidence interval. Vaccinated adults are  
 259 defined as having received at least one dose of vaccine

260

261 **Discussion**

262 In the early stages of the COVID-19 pandemic children did not appear to play a significant role in the  
263 household transmission of SARS-CoV-2 [1]. Data presented here suggest that this has shifted  
264 throughout the course of the pandemic, and in particular since the emergence of VOCs in the  
265 community.

266 The increased role for children in the household transmission of SARS-Cov-2 during the post-VOC  
267 period adds weight to the importance of COVID-19 vaccination programs in children, including those  
268 now beginning in <5 years. This remains a contested issue with many parents finding, in light of the  
269 typically mild disease children experience when infected with SARS-CoV-2, it difficult to make an  
270 informed risk-benefit assessment regarding pediatric vaccination [17]. Whilst the slower rollout of  
271 pediatric COVID-19 vaccination has precluded detailed assessments of the precise effect of pediatric  
272 vaccination on household SARS-CoV-2 transmission, it is promising that vaccination reduced the risk  
273 of infection among cohabitating adults/teenagers [18] and that the person-to-person probability of  
274 SARS-CoV-2 transmission between two vaccinated adults/teenagers was 4% (compared to the 61%  
275 observed between unvaccinated household members) [18]. These data may suggest that pediatric  
276 COVID-19 vaccination during the VOC period will not only reduce the risk of severe disease in the  
277 child but may also play an important role in reducing household transmission of the virus.

278 It remains to be determined if the data shown herein can be translated to scenarios outside of the home  
279 (e.g., SARS-CoV-2 transmission in the school settings). However, even if this should be the case, it is  
280 important not to interpret these data as a rationale for re-introducing or continuing school closures. In  
281 contrast to the early stages of the COVID-19 pandemic, high adult vaccination rates and the increased  
282 availability of pediatric vaccination, combined with a global decline in the severity of SARS-CoV-2  
283 cases and improved disease prevention measures (e.g., ventilation, mask use) represents an opportunity  
284 for continued face-to-face schooling. However, it is clear from these data that public health decisions  
285 such as these need to be derived from data with the current circulating SARS-CoV-2 variants, and not  
286 the ancestral virus, in order to most accurately represent the present situation. Prioritising business as  
287 usual for all domains of society and layering public health measures on top of these has become  
288 operational in most countries learning to live with COVID-19, and this household transmission data  
289 adds weight to the importance of this. Whilst children are long thought to be vectors of high viral  
290 transmission e.g., influenza, RSV, SARS-CoV-2 still does not follow this trend. Children are equally as  
291 likely as adults in the post-VOC era to transmit SARS-CoV-2, but no more likely than adults, unlike in  
292 the seasonal influenza or RSV patterns [19, 20].

293 This study has also provided a new insight into the possible causes of increased VOC transmission  
294 amongst children relative to the ancestral virus. It is possible that these data represent differential  
295 COVID-19 vaccination rates between children and adults, given the role that vaccination can play in  
296 preventing the household transmission of SARS-CoV-2[12]. However, such a hypothesis would  
297 suggest that a comparison of household transmission amongst unvaccinated adults and children during  
298 the VOC period would show a pattern akin to that of the ancestral virus (i.e., an age-dependence

299 difference in susceptibility to infection and infectiousness within a household). Instead, amongst  
300 unvaccinated individuals during the VOC period there was no age-dependent differences in household  
301 SARS-CoV-2 transmission. These data are consistent with different adult and pediatric vaccination  
302 playing a minimal role in the changing epidemiology of SARS-CoV-2 over the course of the pandemic.  
303 Instead, these data may suggest that the evolution of virus over time has resulted in an increased role  
304 for children in viral transmission. Indeed, we have recently shown that the ancestral SARS-CoV-2, but  
305 not Omicron, is less efficient at replicating in the primary nasal epithelial cells of children [21] – which  
306 may have implications for how much virus a child versus an adult shed within the household. However,  
307 it does remain possible that the observed shifts in the epidemiology of SARS-CoV-2 over time  
308 represent changes in the virus in addition to age-dependent differences in both vaccination and  
309 infection. This represents an important area of ongoing research.

310 This study was subject to several limitations. Firstly, only a limited number of studies were available in  
311 the post-VOCs period that documented household SARS-CoV-2 transmission amongst unvaccinated  
312 adults and children. Moreover, the often-mild nature of Omicron infection may have meant that the  
313 SAR in Omicron studies were underestimated. Nevertheless, these data provide the first comprehensive  
314 insight into the shifting role of children in virus transmission over the course of the SARS-CoV-2  
315 pandemic.

316

317 **Author contributions** YZ: conceptualization, methodology, data analysis, writing—original draft  
318 preparation; YX: methodology, data analysis, writing—reviewing and editing; JP: data analysis,  
319 writing—original draft preparation; AB: conceptualization. Writing—reviewing and editing; KS:  
320 conceptualization, methodology, writing—original draft preparation. All authors read and approved the  
321 final manuscript.

322 **Funding**

323 This work is supported by the National Health and Medical Research Council investigator grant  
324 2007919 to K.R.S..

325

326 **Declarations**

327 **Competing interests** KRS is a consultant for Sanofi, Roche and NovoNordisk. The opinions and data  
328 presented in this manuscript are of the authors and are independent of these relationships.

329 **Ethical approval** This is a meta-analysis study. The University of Queensland Research Ethics  
330 Committee has confirmed that no ethical approval is required.

331 **Consent to participate** Not applicable.

332

333

334 **References**

- 335 1. Zhu Y, Bloxham CJ, Hulme KD, et al. A Meta-analysis on the Role of Children in Severe  
336 Acute Respiratory Syndrome Coronavirus 2 in Household Transmission Clusters. *Clin Infect*  
337 *Dis.* 2021; 72(12): e1146-e53.
- 338 2. Goldstein E, Lipsitch M, Cevik M. On the Effect of Age on the Transmission of SARS-CoV-2  
339 in Households, Schools, and the Community. *J Infect Dis* 2021; 223(3): 362-9.
- 340 3. Koelle K, Martin Michael A, Antia R, Lopman B, Dean Natalie E. The changing  
341 epidemiology of SARS-CoV-2. *Science* 2022; 375(6585): 1116-21.
- 342 4. Worldometer. Coronavirus Update (Live). <https://www.worldometersinfo/coronavirus/> 2022;  
343 Date accessed: 30 June 2022.
- 344 5. Ng OT, Koh V, Chiew CJ, et al. Impact of SARS-CoV-2 Vaccination and Paediatric Age on  
345 Delta Variant Household Transmission. *Clin Infect Dis* 2022.
- 346 6. Baker JM, Nakayama JY, O'Hegarty M, et al. SARS-CoV-2 B.1.1.529 (Omicron) Variant  
347 Transmission Within Households - Four U.S. Jurisdictions, November 2021-February 2022.  
348 *MMWR Morb Mortal Wkly Rep* 2022; 71(9): 341-6.
- 349 7. Chen F, Tian Y, Zhang L, Shi Y. The role of children in household transmission of COVID-19:  
350 a systematic review and meta-analysis. *Int J Infect Dis.* 2022; 122: 266-75.
- 351 8. Waltenburg MA, Whaley MJ, Chancey RJ, et al. Household Transmission and Symptomology  
352 of Severe Acute Respiratory Syndrome Coronavirus 2 Alpha Variant Among Children-  
353 California and Colorado, 2021. *J Pediatr* 2022.
- 354 9. Knol MJ, Backer JA, de Melker HE, van den Hof S, Gier B. Transmissibility of SARS-CoV-2  
355 among fully vaccinated individuals. *Lancet Infect Dis* 2022; 22(1): 16-7.
- 356 10. Hause AM, Baggs J, Marquez P, et al. COVID-19 Vaccine Safety in Children Aged 5-11 Years  
357 - United States, November 3-December 19, 2021. *MMWR Morb Mortal Wkly Rep* 2021;  
358 70(5152): 1755-60.
- 359 11. Howard-Jones AR, Bowen AC, Danchin M, et al. COVID-19 in children: I. Epidemiology,  
360 prevention and indirect impacts. *J Paediatr Child Health.* 2022; 58(1): 39-45.
- 361 12. Prunas O, Warren JL, Crawford FW, et al. Vaccination with BNT162b2 reduces transmission  
362 of SARS-CoV-2 to household contacts in Israel. *Science* 2022; 375(6585): 1151-4.
- 363 13. Organization WH. Household transmission investigation protocol for coronavirus disease  
364 2019 (COVID-19), 23 March 2020: World Health Organization, 2020.
- 365 14. Moher D, Liberati A, Tetzlaff J, Altman DG, Group P. Preferred reporting items for systematic  
366 reviews and meta-analyses: the PRISMA statement. *PLoS med* 2009; 6(7): e1000097.
- 367 15. Lin L, Chu H. Meta-analysis of Proportions Using Generalized Linear Mixed Models.  
368 *Epidemiology* 2020; 31(5).
- 369 16. Madewell ZJ, Yang Y, Longini IM, Jr., Halloran ME, Dean NE. Household Secondary Attack  
370 Rates of SARS-CoV-2 by Variant and Vaccination Status: An Updated Systematic Review and  
371 Meta-analysis. *JAMA Netw Open* 2022; 5(4): e229317.
- 372 17. Zhang M-X, Lin X-Q, Chen Y, Tung T-H, Zhu J-S. Determinants of parental hesitancy to  
373 vaccinate their children against COVID-19 in China. *Expert Rev Vaccines.* 2021; 20(10):  
374 1339-49.
- 375 18. Layan M, Gilboa M, Gonen T, et al. Impact of BNT162b2 Vaccination and Isolation on  
376 SARS-CoV-2 Transmission in Israeli Households: An Observational Study. *Am J Epidemiol.*  
377 2022; 191(7): 1224-34.

- 378 19. Tregoning JS, Schwarze J. Respiratory viral infections in infants: causes, clinical symptoms,  
379 virology, and immunology. *Clin Microbiol Rev* 2010; 23(1): 74-98.
- 380 20. Zimmermann P, Curtis N. Why is COVID-19 less severe in children? A review of the  
381 proposed mechanisms underlying the age-related difference in severity of SARS-CoV-2  
382 infections. *Arch Dis Child* 2021; 106(5): 429-39.
- 383 21. Zhu Y, Chew KY, Wu M, et al. Pediatric nasal epithelial cells are less permissive to SARS-  
384 CoV-2 replication compared to adult cells. *bioRxiv* 2022: 2021.03.08.434300.
- 385
